# Supplementary material for: Genome-wide interaction target profiling reveals a novel Peblr20-eRNA activation pathway to control stem cell pluripotency
Source: PubMed Central journal article supplement (PMC6929617; doi:10.7150/thno.39093), 2020-01-01
Supplement: thnov10p0353s1.pdf [file thnov10p0353s1.pdf]

**Genome-wide interaction target profiling reveals a novel *Peblr20*-eRNA activation pathway to control stem cell pluripotency**

Cong Wang<sup>1,2</sup>, Lin Jia<sup>1,2</sup>, Yichen Wang<sup>1,2</sup>, Zhonghua Du<sup>1,2</sup>, Lei Zhou<sup>1</sup>, Xue Wen<sup>1</sup>,  
Hui Li<sup>1</sup>, Shilin Zhang<sup>1,2</sup>, Huiling Chen<sup>2,3</sup>, Naifei Chen<sup>1,2</sup>, Jingcheng Chen<sup>1,2</sup>, Yanbo  
Zhu<sup>1,2</sup>, Yuanyuan Nie<sup>1</sup>, Ilkay Celic<sup>2</sup>, Sujun Gao<sup>1†</sup>, Songling Zhang<sup>1†</sup>, Andrew R.  
Hoffman<sup>2\*†</sup>, Wei Li<sup>1\*†</sup>, Ji-Fan Hu<sup>1,2\*†</sup>, Jiuwei Cui<sup>1†\*</sup>

<sup>1</sup> Stem Cell and Cancer Center, The First Hospital of Jilin University, Changchun,  
Jilin 130061, P.R. China

<sup>2</sup> Stanford University Medical School, VA Palo Alto Health Care System, Palo Alto,  
CA 94304, USA

<sup>3</sup> Department of Endocrinology, Xiangya Hospital, Central South University,  
Changsha, Hunan, P.R. China

## Supplementary materials:

### Figure S1. The genome-wide target analysis of Peblr20 by RAT-Seq.

- A. Profiling pluripotent lncRNAs by integrating RNA-Seq and RAT-Seq. The conventional RNA-Seq approach identifies thousands of lncRNAs that are differentially expressed during pluripotent reprogramming. A modified RAT-seq approach was performed to map the genome wide interacting target genes for the selected lncRNA. It was hypothesized that as a pluripotent lncRNA, it should not only be activated in reprogramming, but also be able to bind to and thereby regulate multiple gene targets of core stem cell factors. Using this strategy, we identified Peblr20 as a pluripotent lncRNA, because it is activated in iPSCs and binds to multiple stemness gene targets.
- B. Genetic features of Peblr20 RAT sequencing. More than 50% of Peblr20 binding sites were genomic intergenic regions and 1.78% was promoter elements.
- C. Interaction of Peblr20 at the Pou5F1 locus. The RAT-seq data were uploaded onto UCSC genome browser by CYVERSE. Control: the RAT library was constructed with random oligo primers. Peblr20: the RAT library was constructed using Peblr20 complementary primers; 5'-Enh: 5'-enhancer; E1-E5: Pou5F1 exons 1-5; 3'-Enh: 3'-enhancer. Note the enriched binding of Peblr20 lncRNA at Pou5F1 3' enhancer, 5' enhancer, and exon5.
- D. Interaction of Peblr20 at the Sox2 locus. Peblr20 binds to the Sox2 5'-enhancer area.
- E. Binding of Peblr20 to the CpG islands of the KLF4 gene.

**Figure S2. Peblr20 lncRNA gene structure.**

- A. The 5'- and 3'- RACE results. The Peblr20 5'- and 3'-ends were amplified by nested PCR, cloned into pJet vector, and sequenced. The 5'-end was different from 1700097N02Rik lncRNA (shown in red). GSP: gene specific primer.
- B. Sequences of 1700097N02Rik and Peblr20. Peblr20 lncRNA is an alternative splicing variant of 1700097N02Rik, but with only two exons (746bp).

**Figure S3. Differential expression of Peblr20 RAT-seq genes.**

- A. Activation of lncRNA Peblr20 in iPSCs.
- B. Differential expression of Peblr20 RAT-seq target gene Pou5F1 between iPSCs and fibroblasts.
- C. Differential expression of Peblr20 RAT-seq target gene Sox2 between iPSCs and fibroblasts.
- D. Differential expression of Peblr20 RAT-seq target gene Tfcp2I1 between iPSCs and fibroblasts.
- E. Differential expression of Peblr20 RAT-seq target gene Etl4 between iPSCs and fibroblasts.
- F. Differential expression of Peblr20 RAT-seq target gene Tgm1 between iPSCs and fibroblasts.

**Figure S4. Peblr20 overexpression and knockdown.**

- A. The Peblr20 shRNA plasmid. Peblr20 was knocked down by two Peblr20 shRNAs under the control of the H1 and U6 promoters, respectively, in a lentiviral pGreen vector.
- B. Single colony selected after Peblr20 knocked down in iPSCs. After Peblr20 shRNA lentiviral transfection, iPSCs were selected by puromycin. Single colonies emitting green signal were picked up and collected for RT- Q-PCR.
- C. The Peblr20 overexpression plasmid. Peblr20 was amplified by PCR according to 5'- and 3'-RACE and was cloned into lentiviral pCMV-DsRed/Puro vector. DsRed was used as the tracking marker.
- D. Transfection of lenti pCMV-DsRed/Puro-Peblr20 in fibroblasts. fibroblasts were transfected by lenti DsRed-Peblr20 plasmid and selected by puromycin for 12 days. Note that nearly 90% of Fib were successfully transfected and emitted red signal.

**Figure S5. Peblr20 induces DNA demethylation in the Pou5F1 promoter.**

- A. CpG sites in the Pou5F1 promoter. The status of DNA methylation at CpG3 site can be quantitated by restriction enzyme HpyCH4IV to separate the methylated and unmethylated DNAs. The restriction enzyme will not cut the unmethylated ACGT when the treatment of sodium bisulfite converts it into ATGT.
- B. The methylation status of CpG3 (site 6). CpG3 was amplified by specific PCR primers, digested by HpyCH4IV, and quantitated by density scanning. Band A: unmethylated products that were not cut by the enzyme; Bands B and C: methylated products that were cut into two bands. Gray values (GV)

of these gel bands were measured by ImageJ and used for quantitation of methylation level(right). Methylation level= $GV(B+C)/GV(A+B+C)$ .

Measurements were performed three times and statistically significant differences by Student's t test are indicated by \*\*\* indicating  $P < 0.001$ .

**Table S1. Oligonucleotide primers**

| <b>Table S1. Oligonucleotide primers used for PCR</b> |                   |                           |                     |
|-------------------------------------------------------|-------------------|---------------------------|---------------------|
| <b>ID</b>                                             | <b>Oligo Name</b> | <b>Oligo Sequence</b>     | <b>Product Size</b> |
| <b>RT-PCR</b>                                         |                   |                           |                     |
| Peblr20                                               | JH4838            | CTATGGGGGCCAGAGCTTGA      | 104bp               |
|                                                       | JH4839            | ACTCCACAACCCCGCCAGCT      |                     |
| $\beta$ -Actin                                        | J880              | CAGGTCATCACCATTGGCAATGAG  | 135bp               |
|                                                       | J881              | CGGATGTCCACGTACACTTCATGA  |                     |
| Pou5F1                                                | JH116             | CAATGCCGTGAAGTTGGAGAAG    | 179bp               |
|                                                       | JH117             | GGCTGAACACCTTTCCAAAGAGA   |                     |
| Sox2                                                  | JH118             | GGTTACCTCTTCTCCACTCCAG    | 193bp               |
|                                                       | JH119             | TCACATGTGCGACAGGGGCAG     |                     |
| Nanog                                                 | JH120             | TCTCCTCCATTCTGAACCTGAGC   | 150bp               |
|                                                       | JH121             | TGCTGGGATACTCCACTGGTGCT   |                     |
| U6                                                    | JH4061            | GTGCTCGCTTCGGCAGCACATATA  | 103bp               |
|                                                       | JH4062            | ATATGGAACGCTTCACGAATTTGCG |                     |
| <b>RAT</b>                                            |                   |                           |                     |
| Peblr20 specific primers                              | JH4839            | ACTCCACAACCCCGCCAGCT      |                     |
|                                                       | JH4841            | GATGATTCTACCCAGGATGCT     |                     |
| Random primer                                         | JH5849            | ATGGACTGATGATCTTATGC      |                     |
|                                                       | JH5850            | TACATAGTAGATCAGATACT      |                     |
| <b>Pou5F1 binding</b>                                 |                   |                           |                     |
| A                                                     | JH4348            | CTGAGTCCTCTGCAAGATGC      | 137bp               |
|                                                       | JH4349            | CCAAGGCACCTGCCTAGGATT     |                     |
| B                                                     | JH4350            | CAGATGAGCCAACAGGTCTG      | 125bp               |
|                                                       | JH4351            | CAGCAACTTTGTCTGAAGTCC     |                     |
| C                                                     | JH4352            | AGTTGTCCCCAGGGGAGCCAT     | 140bp               |
|                                                       | JH4353            | AAGGGGCCTGGGAGGGACTG      |                     |
| D                                                     | JH5932            | GGTTGGAGCCCAACCTATAG      | 112bp               |
|                                                       | JH5933            | GAAGGCGGCTGCCAGACAAT      |                     |
| E                                                     | JH5934            | TGCTGCTGAATGTCAGCCCT      | 159bp               |
|                                                       | JH5935            | CACCATGGAGGGAACCAACT      |                     |
| F                                                     | JH4407            | GTGGAGCAGGCCGAAACTTGC     | 123bp               |
|                                                       | JH4408            | ATTCCATCGGCAGCCTCAGC      |                     |

|                                    |        |                                              |       |
|------------------------------------|--------|----------------------------------------------|-------|
| <b><i>Sox2 binding</i></b>         |        |                                              |       |
| A                                  | JH5936 | TGCATTTCCCTGTCGTCATCTG                       | 131bp |
|                                    | JH5937 | ATGCTTCCTTCTGCCCTCTGA                        |       |
| B                                  | JH5938 | AGTCTGCTCTTCCCTCGGAATG                       | 133bp |
|                                    | JH5939 | CTGCAGAGTCTCGGAGAATGC                        |       |
| C                                  | JH5054 | GAAGCGGCCGTTTCATCGACG                        | 229bp |
|                                    | JH5055 | GTGCGCGTAGCTGTCCATGC                         |       |
|                                    |        |                                              |       |
| <b><i>3'- and 5'-RACE</i></b>      |        |                                              |       |
| 3' GSP                             | JH5292 | GATGGGTCCAGTCCTGTATGA                        |       |
| 3' nested GSP                      | JH5293 | ACCTGTGAATGTGCCATCCAC                        |       |
| 5' GSP                             | JH5291 | GAGACCTGTCAATCCACGTC                         |       |
| 5' nested GSP                      | JH4839 | ACTCCACAACCCCGCCAGCT                         |       |
|                                    |        |                                              |       |
| <b><i>Lenti RsRed-Peblr 20</i></b> |        |                                              |       |
| Peblr20 F                          | JH5416 | TCGGGCGCCAGATATCGAGAGTTCAAAGG<br>AAGTTGGGCGA | 852bp |
| Peblr20 R                          | JH5417 | AGAATCGAAGAATCCAGCATGGAAGCAG<br>TTTATTTAGC   |       |
|                                    |        |                                              |       |
| <b><i>shRNA</i></b>                |        |                                              |       |
| shRNA1                             |        | GCCGTTGAGAGTTCAAAGGAAGTTG                    |       |
| shRNA2                             |        | CTGGCTTGCTTTGCTTTGCTAAATA                    |       |
| shCT                               |        | GCAGCAACTGGACACGTGATCTTAA                    |       |
|                                    |        |                                              |       |
| <b><i>Enhancer RNA</i></b>         |        |                                              |       |
| 5' eRNA1                           | JH4662 | CAGCCCCTAGCCTTGGACCT                         | 133bp |
|                                    | JH4663 | ACACGTCCCCAGCCAGAGATG                        |       |
| 5' eRNA2                           | JH4350 | CAGATGAGCCAACAGGTCTG                         | 124bp |
|                                    | JH4351 | CAGCAACTTTGTCTGAAGTCC                        |       |
| 3' eRNA1                           | JH5932 | GGTTGGAGCCCAACCTATAG                         | 112bp |
|                                    | JH5933 | GAAGGCGGCTGCCAGACAAT                         |       |
| 3' eRNA2                           | JH5934 | TGCTGCTGAATGTCAGCCCT                         | 159bp |
|                                    | JH5935 | CACCATGGAGGGAACCAACT                         |       |
|                                    |        |                                              |       |
| <b><i>DNA methylation</i></b>      |        |                                              |       |
| CpG1                               | JH4878 | TTTAGGGAGGTTGAGAGTTTTGGGT                    | 242bp |

|                     |         |                            |       |
|---------------------|---------|----------------------------|-------|
|                     | JH4879  | CATACTCACCTCCCAATTTCTATAC  |       |
| CpG2                | JH5896  | TATTTTAGGGAAGTTTAGGGTAGGT  | 190bp |
|                     | JH5897  | TCCCCAACTCTCCACCTCTCCTCA   |       |
| CpG3                | JH4880  | GGATAGGTCGAGAGGGTGTAGTGTT  | 285bp |
|                     | JH4881  | CACCCTCTAACCTTAACCTCTAAC   |       |
| CpG4                | JH5992  | GGGATAGTTGGGGTTGGAGTTTAAT  | 160bp |
|                     | JH5993  | ATAAACCCACCAAACTCCCA       |       |
|                     |         |                            |       |
| <b>ChIP-qPCR</b>    |         |                            |       |
| 5' distal enhancer  | JH4350  | CAGATGAGCCAACAGGTCTG       | 125bp |
|                     | JH4351  | CAGCAACTTTGTCTGAAGTCC      |       |
| 5'proximal enhancer | JH6095  | G TTCAGGGTAGGCTCTCTGCA     | 160bp |
|                     | JH6096  | TCCTCAAAGACAGAGCCTCAG      |       |
| 3' enhancer         | JH5932  | GGTTGGAGCCCAACCTATAG       | 112bp |
|                     | JH5933  | GAAGGCGGCTGCCAGACAAT       |       |
|                     |         |                            |       |
| <b>RIP-qPCR</b>     |         |                            |       |
| Peblr20_A           | JH5437  | TCCTTCAACTCCGTCCCCCACA     | 140bp |
|                     | JH5291  | GAGACCTGTCAATCCACGTC       |       |
| Peblr20_B           | JH6097  | GGCACTTCCAGGTGGTAGC        | 120bp |
|                     | JH6098  | GGCACTTCCAGGTGGTAGC        |       |
| Peblr20_C           | JH4840  | GCTGGCTCCTGCAAGATGCT       | 119bp |
|                     | JH4841  | GATGATTCTACCCAGGATGCTC     |       |
| Peblr20_D           | JH5293  | GCTGGCTCCTGCAAGATGCT       | 162bp |
|                     | JH5417  | GATGATTCTACCCAGGATGCTC     |       |
| Positive control    | forward | GGGAGATACCATGATCACGAAGGT   | 110bp |
|                     | reverse | CCACAAATTATGCAGTCGAGTTTCCC |       |



## A Screening of pluripotent lncRNAs

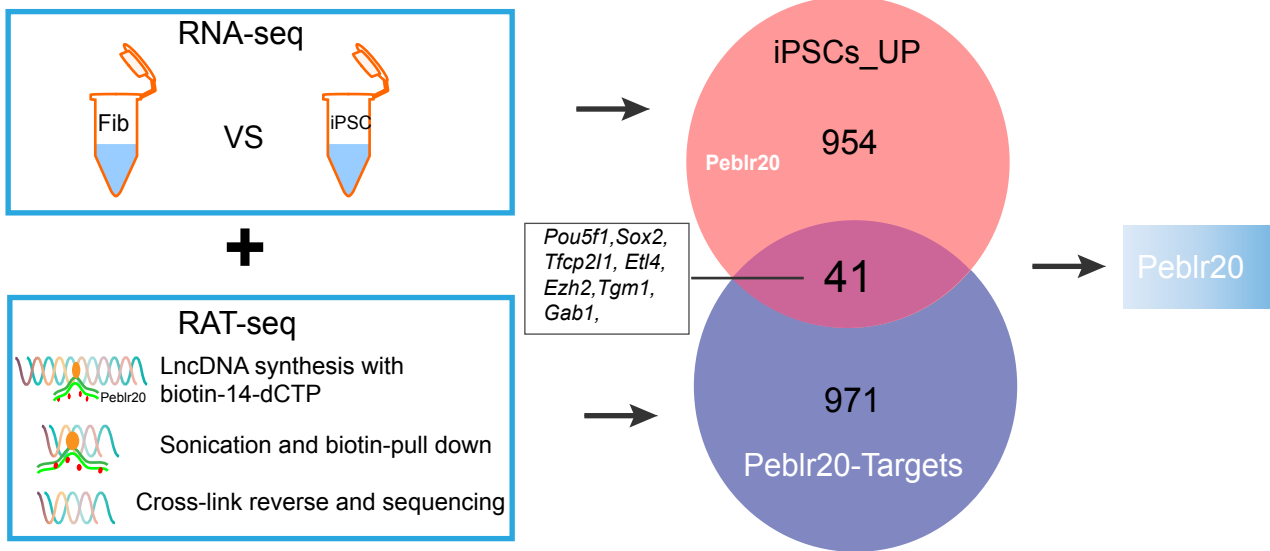

## B Distribution of Pebr20 RAT targets

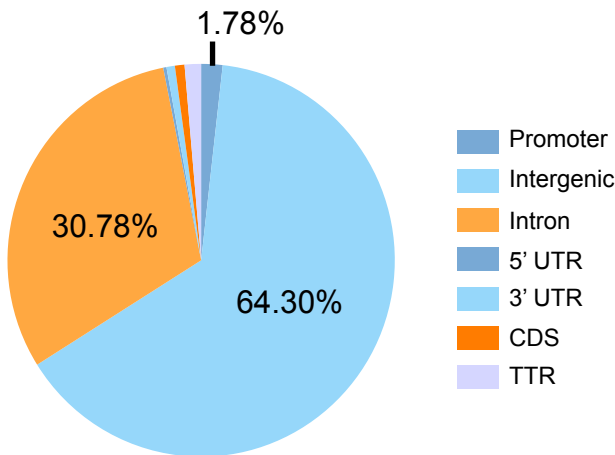

## C Pebr20 binds to Pou5F1

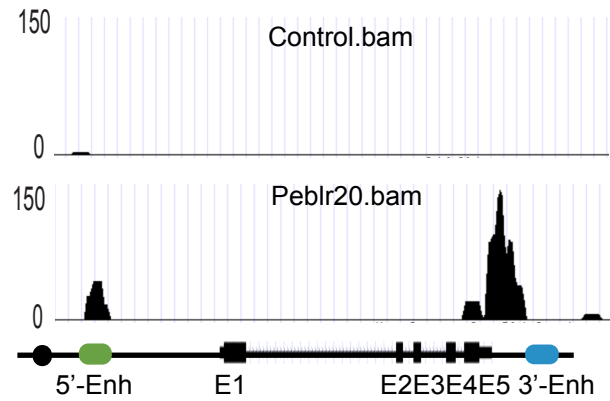

## D Pebr20 binds to Sox2

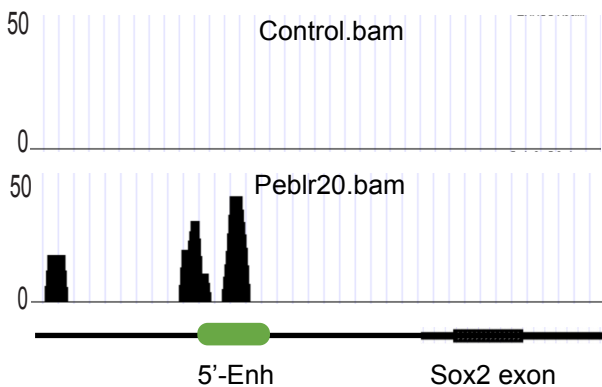

## E Pebr20 binds to Klf4 CpG islands

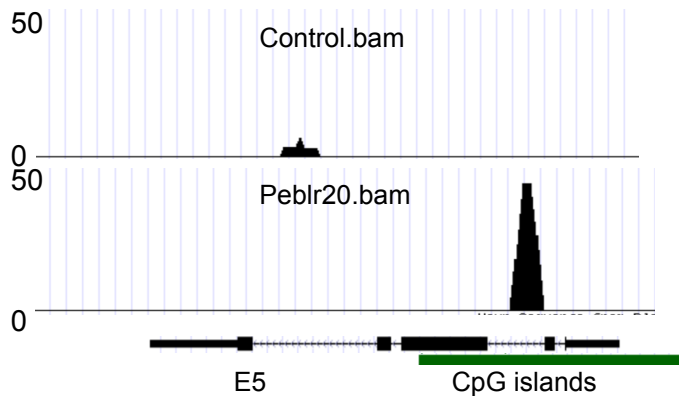

Figure S1. The genome-wide target analysis of Pebr20 by RAT-Seq

## A 5'-RACE and 3'-RACE

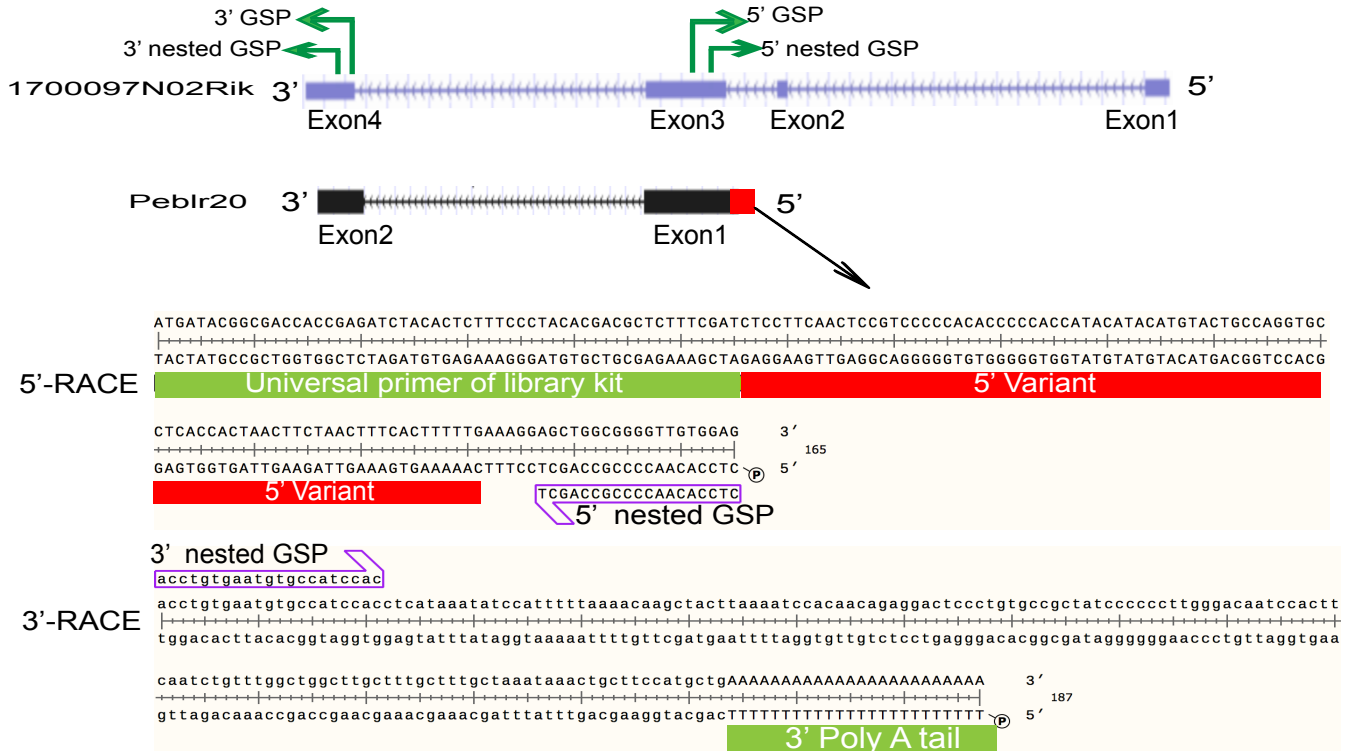

## B Sequences of 1700097N02Rik and Peblr20

### 1700097N02Rik

gcccgcgggtgcctcgggtgcctcgggtgcctcgcctatggggccagagcttgaccatcatcagGcgctgggaacaccactctgggcctcagcaaaaccagcaagtactcttaa  
tgGagctggcggggtgtggagtaagatactcagacgtggattgacaggtctcaccagcacctgacaggatcccggcacttcccagggtgtagcttctacatccgccactccaagct  
tcgatccaccactcactcgcctgcctgtaaaactgtggaggctgtctgaaccttagaccgccaagcaggtcccaacagtggtcgtctgttagagctgccccagctctctgctgc  
cactcggggcgcagccgttgagagtacaaggaagtggggcgggtgctcagccgttagaggtcaaggaagtgggcgagggcgcctcacgcgtggctcctgcaagatgctgag  
cgcccgcgggtgcctcgggtgcctcgggtgcctcgcctatggggccagagcttgaccatcatcagGttttgctagagcatcctgggtagaatcatctggaggatgggtccagtcctgt  
atgatttgtaaaggaaagatcaccctacctgtgaatgcatccacctataaataatccatttttaaaacaagctacttaaaatccacaacagaggactccctgtgccgctatcccc  
ttggacaatccacttcaatctgttggctggctgtcttcttgcctaaataaactgcttcca tgctgtcttgcacc

### Peblr20

tcctcaactcgtcccccacacccccaccatacatatgactgaccaggtgcctcaccactaacttcaacttttcaaaggagctggcggggtgtggagtaagatactcaga  
cgtggattgacaggtctcaccagcacctgacaggatcccggcacttcccagggtgtagcttctacatccgccactcactcgcctgctgtaaactggtg  
ggaggctgtctgaaccttagaccgcaaagcaggtcccaacagtggtgctctgtagagctgccccagctctgctgcccactcggggcgcagccgttgagagtacaaggaagt  
tgggcgggtggtcagccgttgagagtcaaggaagtgggcgagggcgcctcacgcgtggctcctgcaagatgctgag  
ggggccagagcttgaccatcatcagGttttgctagagcatcctgggtagaatcatctggaggatgggtccagtcctgtatgattgtaaaggaaagagtcaccctacctgtgaatgtg  
catccacctataaataatccatttttaaaacaagctacttaaaatccacaacagaggactccctgtgccgctatcccccttggacaatccacttcaatctgttggctggctgtcttgc  
ctaaataaactgcttccatgct

Figure S2. Peblr20 lncRNA gene structure

### A LncRNA Peblr20

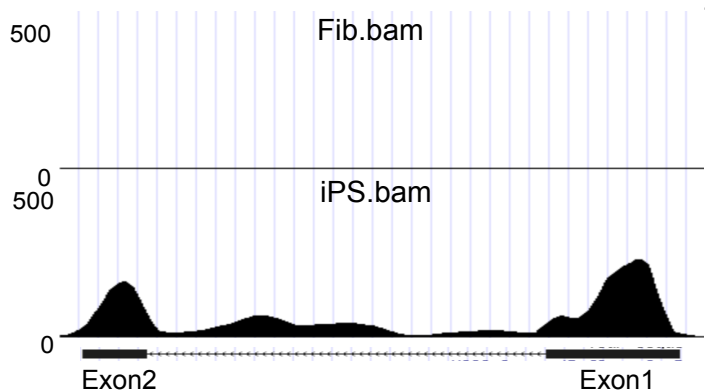

### B Pou5F1

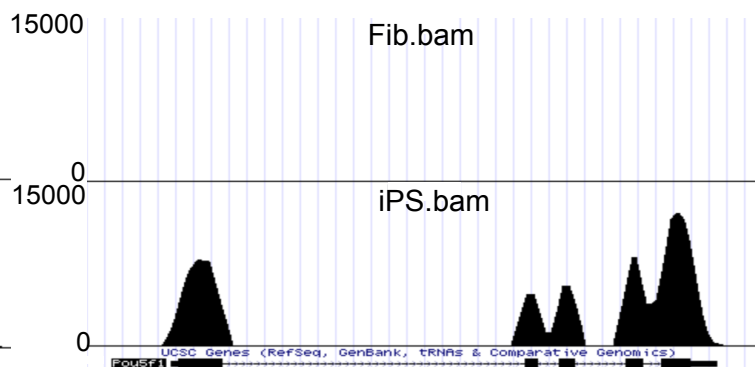

### C Sox2

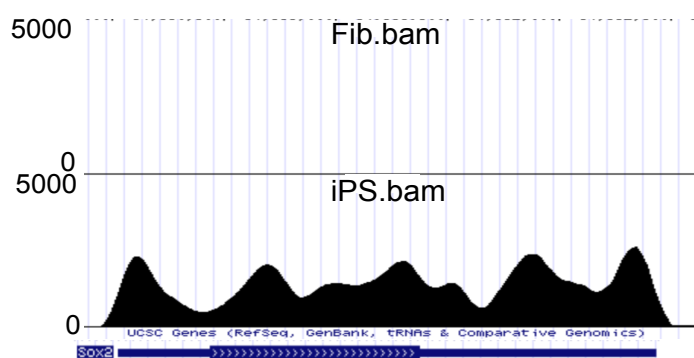

### D Tfcp2l1

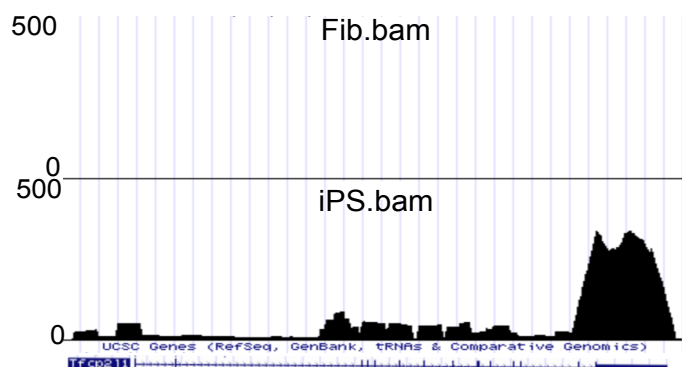

### E Et14

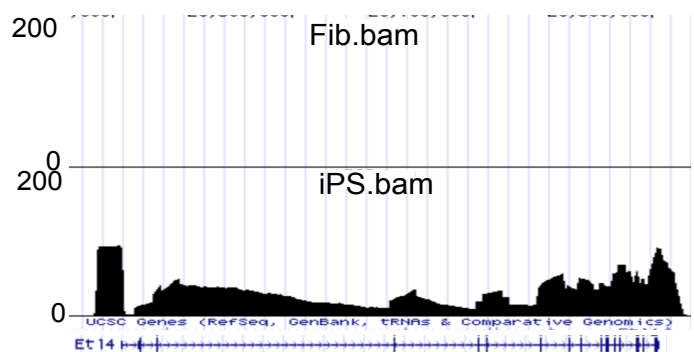

### F Tgm1

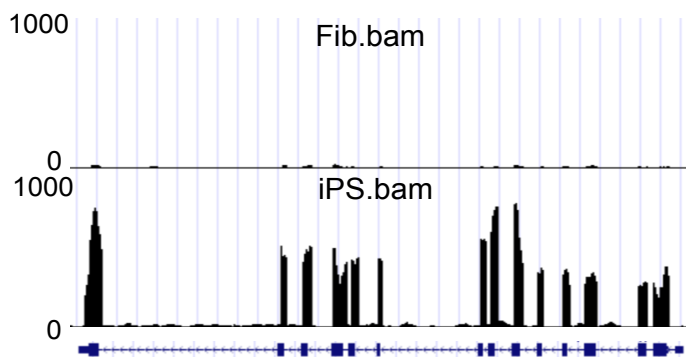

Figure S3. Differential expression of Peblr20 RAT-seq target genes

### A Peblr20 shRNA vector

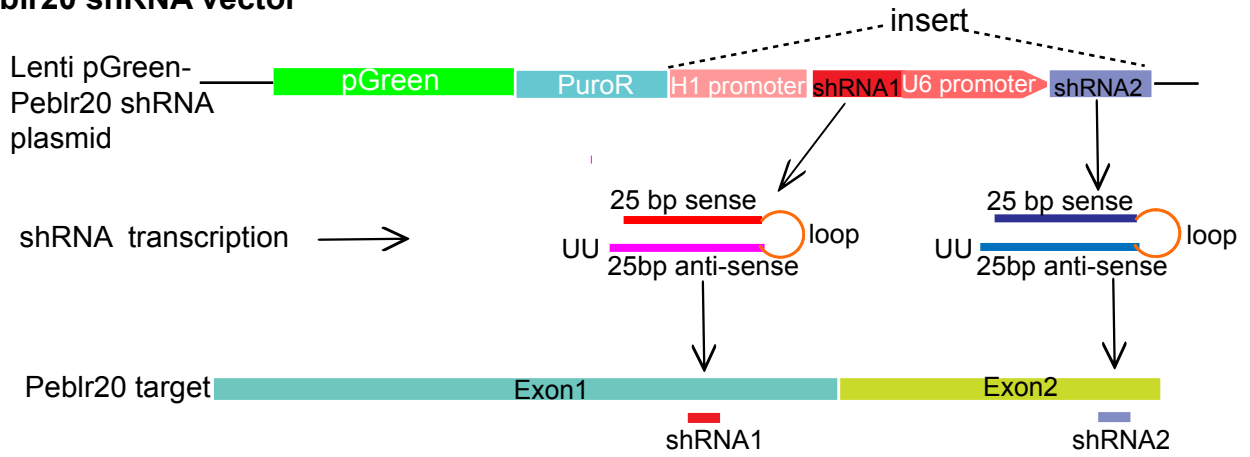

### B Peblr20 knockdown iPSCs

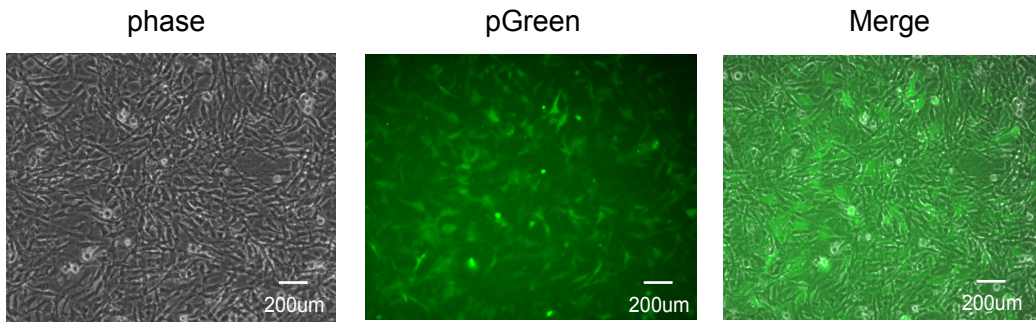

### C Peblr20 overexpression vector

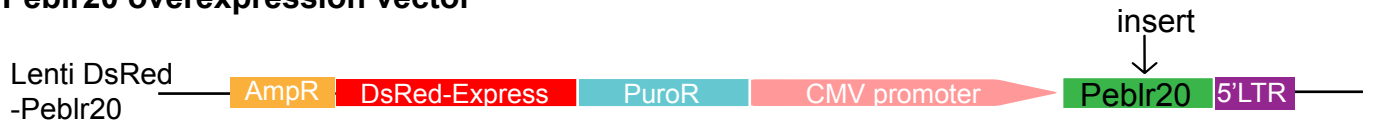

### D Transfection efficiency in Fib

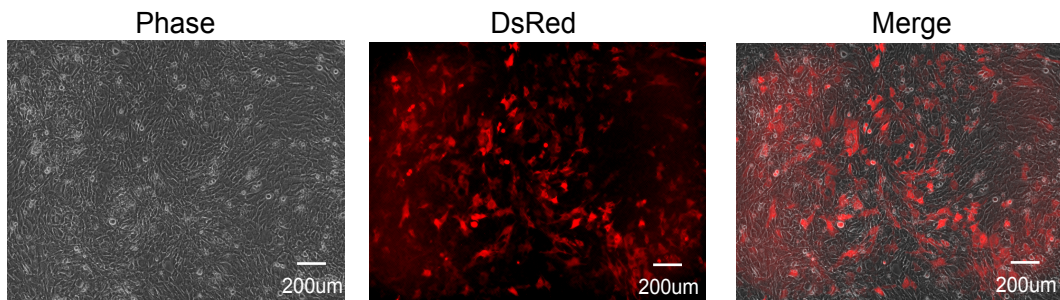

Figure S4. Peblr20 overexpression and knockdown

## A Restriction enzyme cutting sites of CpG islands

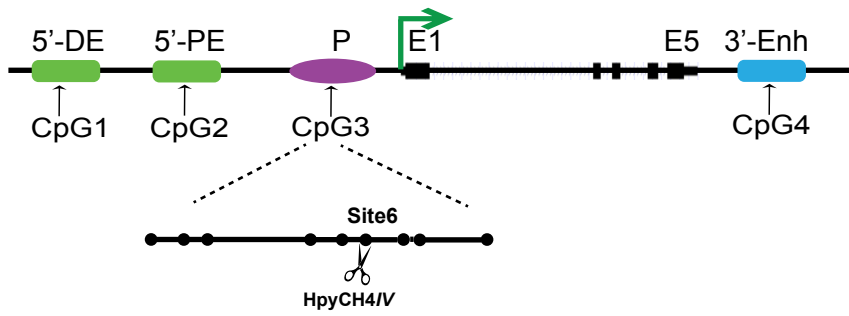

## B Methylation levels of CpG3 (site 6)

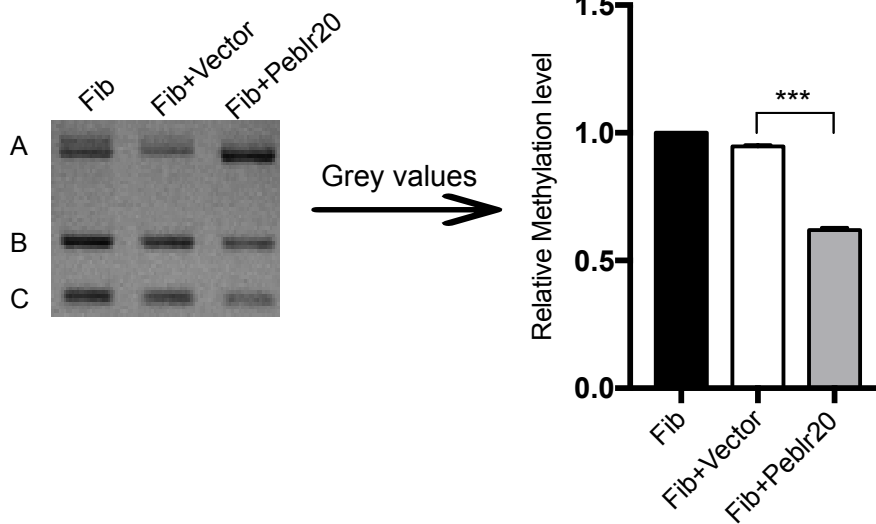

Figure S5. Peblr20 induces DNA demethylation in the Pou5F1 promoter
